# Supplementary material for: A Long-Term Comparative Analysis of Endovascular Coiling and Clipping for Ruptured Cerebral Aneurysms: An Individual Patient-Level Meta-Analysis Assessing Rerupture Rates
Source: MDPI journal article supplement (doi:10.3390/jcm13061778), 2024-03-20
Supplement: s1 [file s1]

Figure S1: PRISMA checklist

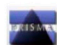

## PRISMA 2020 Checklist

| Section and Topic    | Item # | Checklist item                                                                                                                                                                                                                                                                                                                                                                                                                                                                                                                                                                                                                                                                                                                                                                                                                                                                                                                                                                                                                                                           | Location where item is reported |
|----------------------|--------|--------------------------------------------------------------------------------------------------------------------------------------------------------------------------------------------------------------------------------------------------------------------------------------------------------------------------------------------------------------------------------------------------------------------------------------------------------------------------------------------------------------------------------------------------------------------------------------------------------------------------------------------------------------------------------------------------------------------------------------------------------------------------------------------------------------------------------------------------------------------------------------------------------------------------------------------------------------------------------------------------------------------------------------------------------------------------|---------------------------------|
| <b>TITLE</b>         |        |                                                                                                                                                                                                                                                                                                                                                                                                                                                                                                                                                                                                                                                                                                                                                                                                                                                                                                                                                                                                                                                                          |                                 |
| Title                | 1      | A long-term Comparative Analysis of Endovascular Coiling and Clipping for Ruptured Cerebral Aneurysms: An Individual Patient-Level Meta-Analysis Assessing Re-Rupture Rates                                                                                                                                                                                                                                                                                                                                                                                                                                                                                                                                                                                                                                                                                                                                                                                                                                                                                              | Title                           |
| <b>ABSTRACT</b>      |        |                                                                                                                                                                                                                                                                                                                                                                                                                                                                                                                                                                                                                                                                                                                                                                                                                                                                                                                                                                                                                                                                          |                                 |
| Abstract             | 2      | Re-rupture after aneurysmal subarachnoid hemorrhage (aSAH) is rare. However, long-term data of ISAT are limited by high proportions of good grade aSAH patients and small aneurysms. We aim to investigate the impact of Coiling and Clipping regarding the re-rupture of the initially ruptured target aneurysms via a literature search in PubMed, Medline, Cochrane, and Embase until 1 <sup>st</sup> August 2023. After the available studies following inclusion and exclusion criteria were screened, the main outcome measures were strictly extracted.                                                                                                                                                                                                                                                                                                                                                                                                                                                                                                           | Abstract                        |
| <b>INTRODUCTION</b>  |        |                                                                                                                                                                                                                                                                                                                                                                                                                                                                                                                                                                                                                                                                                                                                                                                                                                                                                                                                                                                                                                                                          |                                 |
| Rationale            | 3      | Aneurysmal subarachnoid hemorrhage (aSAH) is a severe condition with high morbidity and mortality despite recent treatment advances [1]. Complete obliteration of the ruptured aneurysm dome is the preferred therapy [2]. The 2023 AHA/ASA Guidelines suggest clipping or coiling when clinically feasible [3]. In the acute phase and mid-term follow-up, both procedures yield similar results when properly indicated [2, 4]. However, the long-term complication of re-rupture with a second hemorrhage event must be prevented at all costs [5]. A possible cause is an aneurysm remnant that grows over time, leading to a second aSAH [6]. Long-term follow-up is crucial to assess re-rupture rates and compare occlusion methods accurately. Individual patient data (IPD) meta-analysis is the most suitable method [7], but it hasn't been done for re-bleeding rates to date.                                                                                                                                                                               | Introduction                    |
| Objectives           | 4      | Our study aims to conduct an IPD meta-analysis on re-bleeding rates in aSAH patients who underwent surgical clipping or endovascular coiling and were appropriately followed up [7].                                                                                                                                                                                                                                                                                                                                                                                                                                                                                                                                                                                                                                                                                                                                                                                                                                                                                     | Introduction                    |
| <b>METHODS</b>       |        |                                                                                                                                                                                                                                                                                                                                                                                                                                                                                                                                                                                                                                                                                                                                                                                                                                                                                                                                                                                                                                                                          |                                 |
| Eligibility criteria | 5      | We searched for "aneurysmal subarachnoid hemorrhage re-rupture" in Pubmed, Medline, Cochrane and Embase database until 1 <sup>st</sup> August 2023 and found 240 eligible studies. Subsequently, we screened meta-analyses on subarachnoid hemorrhage for further possibly eligible studies. Included were all studies describing re-rupture-free survival data of the initially treated ruptured aneurysms ("target aneurysm") after Coiling or Clipping with Kaplan-Meier charts and corresponding patient number at risk tables. We excluded case studies, study protocols, non-clinical trials and meta-analyses. The re-rupture event is limited to rebleedings from an already previously ruptured aneurysm which has been successfully treated by coiling or clipping. No data on re-rupture from untreated aneurysms at other sites or de novo aneurysms that caused a second aSAH were included. Two reviewers (JW, MV) independently screened abstracts, and full-text articles for two rounds, with any residual conflicts resolved by a third reviewer (EG). | Methods                         |
| Information sources  | 6      | We searched for "aneurysmal subarachnoid hemorrhage re-rupture" in Pubmed, Medline, Cochrane and Embase database until 1 <sup>st</sup> August 2023 and found 240 eligible studies.                                                                                                                                                                                                                                                                                                                                                                                                                                                                                                                                                                                                                                                                                                                                                                                                                                                                                       | Methods                         |
| Search strategy      | 7      | Included were all studies describing re-rupture-free survival data of the initially treated ruptured aneurysms ("target aneurysm") after Coiling or Clipping with Kaplan-Meier charts and corresponding patient number at risk tables. We excluded case studies, study protocols, non-clinical trials and meta-analyses. The re-rupture event is limited to rebleedings from an already previously ruptured aneurysm which has been successfully treated by coiling or clipping.                                                                                                                                                                                                                                                                                                                                                                                                                                                                                                                                                                                         | Methods                         |
| Selection process    | 8      | We performed title screening, abstract screening and in case of uncertainty a whole text screening to search for the eligible studies.                                                                                                                                                                                                                                                                                                                                                                                                                                                                                                                                                                                                                                                                                                                                                                                                                                                                                                                                   | Methods                         |

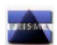

## PRISMA 2020 Checklist

| Section and Topic             | Item # | Checklist item                                                                                                                                                                                                                                                                                                                                                                                                                                                                                                                                                                                                                                                                                                                                                                                                                                                                                                                                                                                                                                                                                                                                                                                                                                                                                                                                                                                                                                                                                                                                    | Location where item is reported |
|-------------------------------|--------|---------------------------------------------------------------------------------------------------------------------------------------------------------------------------------------------------------------------------------------------------------------------------------------------------------------------------------------------------------------------------------------------------------------------------------------------------------------------------------------------------------------------------------------------------------------------------------------------------------------------------------------------------------------------------------------------------------------------------------------------------------------------------------------------------------------------------------------------------------------------------------------------------------------------------------------------------------------------------------------------------------------------------------------------------------------------------------------------------------------------------------------------------------------------------------------------------------------------------------------------------------------------------------------------------------------------------------------------------------------------------------------------------------------------------------------------------------------------------------------------------------------------------------------------------|---------------------------------|
| Data collection process       | 9      | The data collection was performed by two authors independently (MV, JW). First the study titles were screened, then the corresponding abstract and in case of further uncertainty the full-text was screened by two authors (JW and EG) until all retrieved studies were either included or excluded. Two authors (JW, MV) independently extracted the following data from the studies: clinical and imaging characteristics of aSAH patients, prevalence of coiled or clipped ruptured cerebral aneurysms, and data regarding re-rupture-free survival in cases with coiled or clipped ruptured cerebral aneurysms. The IPD information of re-rupture-free survival was extracted from the published Kaplan-Meier survival charts and patient number at risk tables using Digitizelt (Version 2.5.10 for macOS, Braunschweig, Germany) [10]. This method was performed for each individual subgroup of aSAH patients who underwent coiling or clipping. The extracted re-rupture-free survival data and the published number at risk tables were used to reconstruct the Kaplan-Meier curves for each included study using the method of Liu et al. with the R package <i>IPDfromKM</i> in R studio (Rstudio, Boston, MA, USA) [11]. Furthermore, the number at risk tables were also created. Afterwards, the reconstructed curves, number at risk tables, estimated HRs, and estimated 95% confidence intervals were compared with those in the original publications. In case of apparent discrepancies, the extraction process was repeated. | Methods                         |
| Data items                    | 10a    | We analyzed the studies to conduct a meta-analysis according to the following outcomes:<br>1) In case of coiling or clipping for aSAH, following outcomes were analyzed: Probabilities of re-rupture of the initially ruptured and treated "target" aneurysm                                                                                                                                                                                                                                                                                                                                                                                                                                                                                                                                                                                                                                                                                                                                                                                                                                                                                                                                                                                                                                                                                                                                                                                                                                                                                      | Methods                         |
| Study risk of bias assessment | 11     | The National Institutes of Health Quality Assessment Tool for observational cohort and cross-sectional studies (NIH-QAT) was used for the assessment of quality and risk of bias of included studies [9].                                                                                                                                                                                                                                                                                                                                                                                                                                                                                                                                                                                                                                                                                                                                                                                                                                                                                                                                                                                                                                                                                                                                                                                                                                                                                                                                         | Methods                         |
| Effect measures               | 12     | We measured and reported outcomes in Forest-plots, providing heterogeneity and inconsistency analysis, pooled hazard ratios and statistical significance. Furthermore, a pooled Kaplan-meier chart of the reconstructed IPD was generated.                                                                                                                                                                                                                                                                                                                                                                                                                                                                                                                                                                                                                                                                                                                                                                                                                                                                                                                                                                                                                                                                                                                                                                                                                                                                                                        | Methods                         |
| Synthesis methods             | 13a    | To see all the eligible studies and reported outcomes, see Table 1                                                                                                                                                                                                                                                                                                                                                                                                                                                                                                                                                                                                                                                                                                                                                                                                                                                                                                                                                                                                                                                                                                                                                                                                                                                                                                                                                                                                                                                                                | Methods                         |
|                               | 13b    | To see all the eligible studies and reported outcomes, see Table 1                                                                                                                                                                                                                                                                                                                                                                                                                                                                                                                                                                                                                                                                                                                                                                                                                                                                                                                                                                                                                                                                                                                                                                                                                                                                                                                                                                                                                                                                                | Methods                         |
|                               | 13c    | For visualization of our meta-analysis, Forest Plots were created with Review Manager Web (RevMan Web Version 5.4.1 from the Cochrane Collaboration, available at revman.cochrane.org) were presented as figures to selected outcomes. IPD was generated using the R package <i>IPDfromKM</i> in R studio (Rstudio, Boston, MA, USA) [11]. Kaplan-Meier curves of re-rupture-free survival were constructed for the whole included patient cohort using the R package <i>Survminer</i> and <i>Survival</i> in R software version 4.3.1 (R Foundation for Statistical Computing, Vienna, Austria)                                                                                                                                                                                                                                                                                                                                                                                                                                                                                                                                                                                                                                                                                                                                                                                                                                                                                                                                                  | Methods                         |
|                               | 13d    | Patient demographics and disease-specific characteristics of the included studies were recorded and compared using the two-sided Pearson's chi-squared test. The IPD information of all time-to-re-rupture data from all the included trials was pooled, and Kaplan-Meier curves of re-rupture-free survival were constructed for the whole included patient cohort using the R package <i>Survminer</i> and <i>Survival</i> in R software version 4.3.1 (R Foundation for Statistical Computing, Vienna, Austria). The 1-, 6-, and 10-years re-rupture-free survival probabilities were calculated. The hazard ratios (HR) of each individual study as well as the pooled HR and corresponding 95% confidence intervals (CI) between clipped and coiled aSAH patients were estimated. In the two-stage meta-analysis, we combined the estimated hazard ratios (HRs) and their corresponding 95% CI from individual studies using a random-effects model, employing the generic inverse variance method. The calculated HRs were logarithmically transformed (LN). For each study, the standard error (SE) was derived from the 95% CI using the formula: $SE = (LN(upper\ CI\ limit) - LN(lower\ CI\ limit)) / 3.92$ , as outlined in the Cochrane Handbook for Systematic Reviews of Interventions, Version 6.4 [12]. Heterogeneity across the included studies was                                                                                                                                                                             | Methods                         |

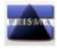

## PRISMA 2020 Checklist

| Section and Topic             | Item # | Checklist item                                                                                                                                                                                                                                                                                                                                                                                                                                                                                                                                                                                                                                                                                                                                                                        | Location where item is reported |
|-------------------------------|--------|---------------------------------------------------------------------------------------------------------------------------------------------------------------------------------------------------------------------------------------------------------------------------------------------------------------------------------------------------------------------------------------------------------------------------------------------------------------------------------------------------------------------------------------------------------------------------------------------------------------------------------------------------------------------------------------------------------------------------------------------------------------------------------------|---------------------------------|
|                               |        | evaluated using $I^2$ statistics, with a threshold of >50% displaying substantial heterogeneity [13]. The aggregated results were presented in forest plots utilizing Review Manager Web (RevMan Web Version 5.4.1 from The Cochrane Collaboration). Weight of the relative contribution of the included studies, based on the sample size, was considered concerning the estimation of the treatment effects. A significance level of $p < 0.05$ was considered statistically significant. To evaluate publication bias, we performed a two-step approach. Firstly, visually assessment via funnel plots was performed. Funnel plots were created using the R package <i>metafor</i> . Secondly, Begg's test was performed to statistically evaluate the asymmetry of the data [14]. |                                 |
|                               | 13e    | Not available                                                                                                                                                                                                                                                                                                                                                                                                                                                                                                                                                                                                                                                                                                                                                                         | Methods                         |
|                               | 13f    | Not available                                                                                                                                                                                                                                                                                                                                                                                                                                                                                                                                                                                                                                                                                                                                                                         | Methods                         |
| Reporting bias assessment     | 14     | According to our strict inclusion criteria and high quality of included studies, we do not suppose to have bias due to missing results. Risk of bias assessment was performed for all included studies                                                                                                                                                                                                                                                                                                                                                                                                                                                                                                                                                                                | Methods                         |
| Certainty assessment          | 15     | Quality assessment was performed and the risk of bias assessment is summarized in supplemental figure 2.                                                                                                                                                                                                                                                                                                                                                                                                                                                                                                                                                                                                                                                                              | Methods                         |
| <b>RESULTS</b>                |        |                                                                                                                                                                                                                                                                                                                                                                                                                                                                                                                                                                                                                                                                                                                                                                                       |                                 |
| Study selection               | 16a    | Process of the search and selection is summarized in Figure 2.                                                                                                                                                                                                                                                                                                                                                                                                                                                                                                                                                                                                                                                                                                                        | Figure 1                        |
|                               | 16b    | Excluded studies are summarized in supplementary Figure 2.                                                                                                                                                                                                                                                                                                                                                                                                                                                                                                                                                                                                                                                                                                                            | Figure 1                        |
| Study characteristics         | 17     | Included studies are summarized in table 1.                                                                                                                                                                                                                                                                                                                                                                                                                                                                                                                                                                                                                                                                                                                                           | Table 1                         |
| Risk of bias in studies       | 18     | Risk of bias analysis is reported in supplementary figure 2.                                                                                                                                                                                                                                                                                                                                                                                                                                                                                                                                                                                                                                                                                                                          | Supplemental Figure 2           |
| Results of individual studies | 19     | Analysis of each outcome is separately reported on with it's own forest plot in Figure 3.                                                                                                                                                                                                                                                                                                                                                                                                                                                                                                                                                                                                                                                                                             | Figures 3                       |
| Results of syntheses          | 20a    | Risk of bias assessment is summarized in the supplementary figure 2. Figure 4 represents the funnel plot visualizing the publication bias                                                                                                                                                                                                                                                                                                                                                                                                                                                                                                                                                                                                                                             | Suppl. Figure 2 & Figure 4      |
|                               | 20b    | Results of the statistical syntheses are summarized in the Figures 2, and Figure 3.                                                                                                                                                                                                                                                                                                                                                                                                                                                                                                                                                                                                                                                                                                   | Figures 2 & 3                   |
|                               | 20c    | Results regarding heterogeneity are presented in the Figure 3.                                                                                                                                                                                                                                                                                                                                                                                                                                                                                                                                                                                                                                                                                                                        | Figure 3                        |
|                               | 20d    | Presented                                                                                                                                                                                                                                                                                                                                                                                                                                                                                                                                                                                                                                                                                                                                                                             | Results                         |
| Reporting biases              | 21     | Risk of bias assessment is shown in Figure 4                                                                                                                                                                                                                                                                                                                                                                                                                                                                                                                                                                                                                                                                                                                                          | Figure 4                        |
| Certainty of evidence         | 22     | Not available                                                                                                                                                                                                                                                                                                                                                                                                                                                                                                                                                                                                                                                                                                                                                                         | NA                              |
| <b>DISCUSSION</b>             |        |                                                                                                                                                                                                                                                                                                                                                                                                                                                                                                                                                                                                                                                                                                                                                                                       |                                 |
| Discussion                    | 23a    | Provide a general interpretation of the results in the context of other evidence.<br>Presented                                                                                                                                                                                                                                                                                                                                                                                                                                                                                                                                                                                                                                                                                        | Discussion                      |

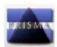

## PRISMA 2020 Checklist

| Section and Topic                              | Item # | Checklist item                                                                                                                                                                                                     | Location where item is reported |
|------------------------------------------------|--------|--------------------------------------------------------------------------------------------------------------------------------------------------------------------------------------------------------------------|---------------------------------|
|                                                | 23b    | Discuss any limitations of the evidence included in the review.<br>Presented                                                                                                                                       | Discussion, last paragraph      |
|                                                | 23c    | Discuss any limitations of the review processes used.<br>Presented                                                                                                                                                 | Discussion, last paragraph      |
|                                                | 23d    | Discuss implications of the results for practice, policy, and future research.<br>Presented                                                                                                                        | Discussion                      |
| <b>OTHER INFORMATION</b>                       |        |                                                                                                                                                                                                                    |                                 |
| Registration and protocol                      | 24a    | The study was registered in the "International Prospective Register of Systematic Reviews" (PROSPERO) in 2023 (CRD42023463253)                                                                                     | Methods                         |
|                                                | 24b    | The study was registered in the "International Prospective Register of Systematic Reviews" (PROSPERO) in 2023 (CRD42023463253)                                                                                     | Methods                         |
|                                                | 24c    | No amendments to describe                                                                                                                                                                                          |                                 |
| Support                                        | 25     | There is no financial conflict of interest to declare                                                                                                                                                              | NA                              |
| Competing interests                            | 26     | No competing interests of the authors to declare                                                                                                                                                                   | NA                              |
| Availability of data, code and other materials | 27     | Template data collection form, data extracted and used for the analysis are reported in the section "methods". The softwares Revman, R packages (IPDfromKM, SURVMINER, METAFOR, and SURVIVAL) are available online | Methods                         |

From: Page MJ, McKenzie JE, Bossuyt PM, Boutron I, Hoffmann TC, Mulrow CD, et al. The PRISMA 2020 statement: an updated guideline for reporting systematic reviews. *BMJ* 2021;372:n71. doi: 10.1136/bmj.n71

For more information, visit: <http://www.prisma-statement.org/>

Figure S2: NIH-Quality assessment of the included studies

| NIH Quality assessment<br><b>Controlled Intervention Studies</b> | Was the study described as randomized, a randomized trial, a randomized clinical trial, or an RCT? | Was the method of randomization adequate (i.e., use of randomly generated assignment)? | Was the treatment allocation concealed (so that assignments could not be predicted)? | Were study participants and providers blinded to treatment group assignment? | Were the people assessing the outcomes blinded to the participant's group assignments? | Were the groups similar at baseline on important characteristics that could affect outcomes (e.g., demographics, risk factors, co-morbid conditions)? | Was the overall drop-out rate from the study at endpoint 20% or lower of the number allocated to treatment? | Was the differential drop-out rate (between treatment groups) at endpoint 15 percentage points or lower? | Was there high adherence to the intervention protocols for each treatment group? | Were other interventions avoided or similar in the groups (e.g., similar background treatments)? | Were outcomes assessed using valid and reliable measures, implemented consistently across all study participants? | Did the authors report that the sample size was sufficiently large to be able to detect a difference in the main outcome between groups with at least 80% power? | Were outcomes reported or subgroups analyzed prespecified (i.e., identified before analyses were conducted)? | Were all randomized participants analyzed in the group to which they were originally assigned, i.e., did they use an intention-to-treat analysis? |
|------------------------------------------------------------------|----------------------------------------------------------------------------------------------------|----------------------------------------------------------------------------------------|--------------------------------------------------------------------------------------|------------------------------------------------------------------------------|----------------------------------------------------------------------------------------|-------------------------------------------------------------------------------------------------------------------------------------------------------|-------------------------------------------------------------------------------------------------------------|----------------------------------------------------------------------------------------------------------|----------------------------------------------------------------------------------|--------------------------------------------------------------------------------------------------|-------------------------------------------------------------------------------------------------------------------|------------------------------------------------------------------------------------------------------------------------------------------------------------------|--------------------------------------------------------------------------------------------------------------|---------------------------------------------------------------------------------------------------------------------------------------------------|
| <b>Molyneux 2009</b>                                             | Y                                                                                                  | Y                                                                                      | Y                                                                                    | N                                                                            | N                                                                                      | Y                                                                                                                                                     | Y                                                                                                           | Y                                                                                                        | Y                                                                                | NA                                                                                               | Y                                                                                                                 | Y                                                                                                                                                                | Y                                                                                                            | Y                                                                                                                                                 |

Y = Yes; N = No; NA = Not applicable

| NIH Quality assessment<br><b>Observational cohort and Cross-sectional studies</b> | Research question or objective stated | Study population defined | Participant rate at least 50% from eligible | Subject recruitment and eligibility criteria | Sample size justification | Exposure(s) measured prior to the outcome(s) | Sufficient time frame | Examination of different levels of exposure as related to the outcome | Definition and validation of the exposure measures | Exposure(s) assessed more than once | Definition of outcome measures | Blinded assessors | Loss to follow-up after baseline of 20% or less | Statistical measure and adjustment of key confounding variables |
|-----------------------------------------------------------------------------------|---------------------------------------|--------------------------|---------------------------------------------|----------------------------------------------|---------------------------|----------------------------------------------|-----------------------|-----------------------------------------------------------------------|----------------------------------------------------|-------------------------------------|--------------------------------|-------------------|-------------------------------------------------|-----------------------------------------------------------------|
| <b>CARAT 2006</b>                                                                 | Y                                     | Y                        | Y                                           | Y                                            | N                         | Y                                            | Y                     | NA                                                                    | Y                                                  | N                                   | Y                              | N                 | NA                                              | N                                                               |

Y = Yes; N = No; NA = Not applicable
